# Supplementary material for: Geochronological reconstruction of the glacial evolution in the Ésera valley (Central Pyrenees) during the last deglaciation
Source: Copernicus journal article supplement (doi:10.5194/cp-2024-75), 2024-12-09
Supplement: Supplementary file 1 [file cp-2024-75-supplement.pdf]

## Supplementary Material for

# Geochronological reconstruction of glacial evolution in the Ésera valley (Central Pyrenees) during the last deglaciation

Ixeia Vidaller<sup>1</sup>, Toshiyuki Fujioka<sup>2</sup>, ASTER Team<sup>3,\*</sup>, Juan Ignacio López-Moreno<sup>1</sup>, Ana Moreno<sup>1</sup>

<sup>1</sup> Instituto Pirenaico de Ecología, Consejo Superior de Investigaciones Científicas (IPE-CSIC), Zaragoza, Spain

<sup>2</sup> Centro Nacional de Investigación sobre la Evolución Humana (CENIEH), Burgos, Spain

<sup>3</sup> CNRS, Aix Marseille Univ, IRD, INRAE, CEREGE, Aix-en-Provence, France

<sup>3</sup> Aster Team: G. Aumaître, K. Keddadouche, F. Zaïdi

*Correspondence to:* Ixeia Vidaller (ixeia@ipe.csic.es)

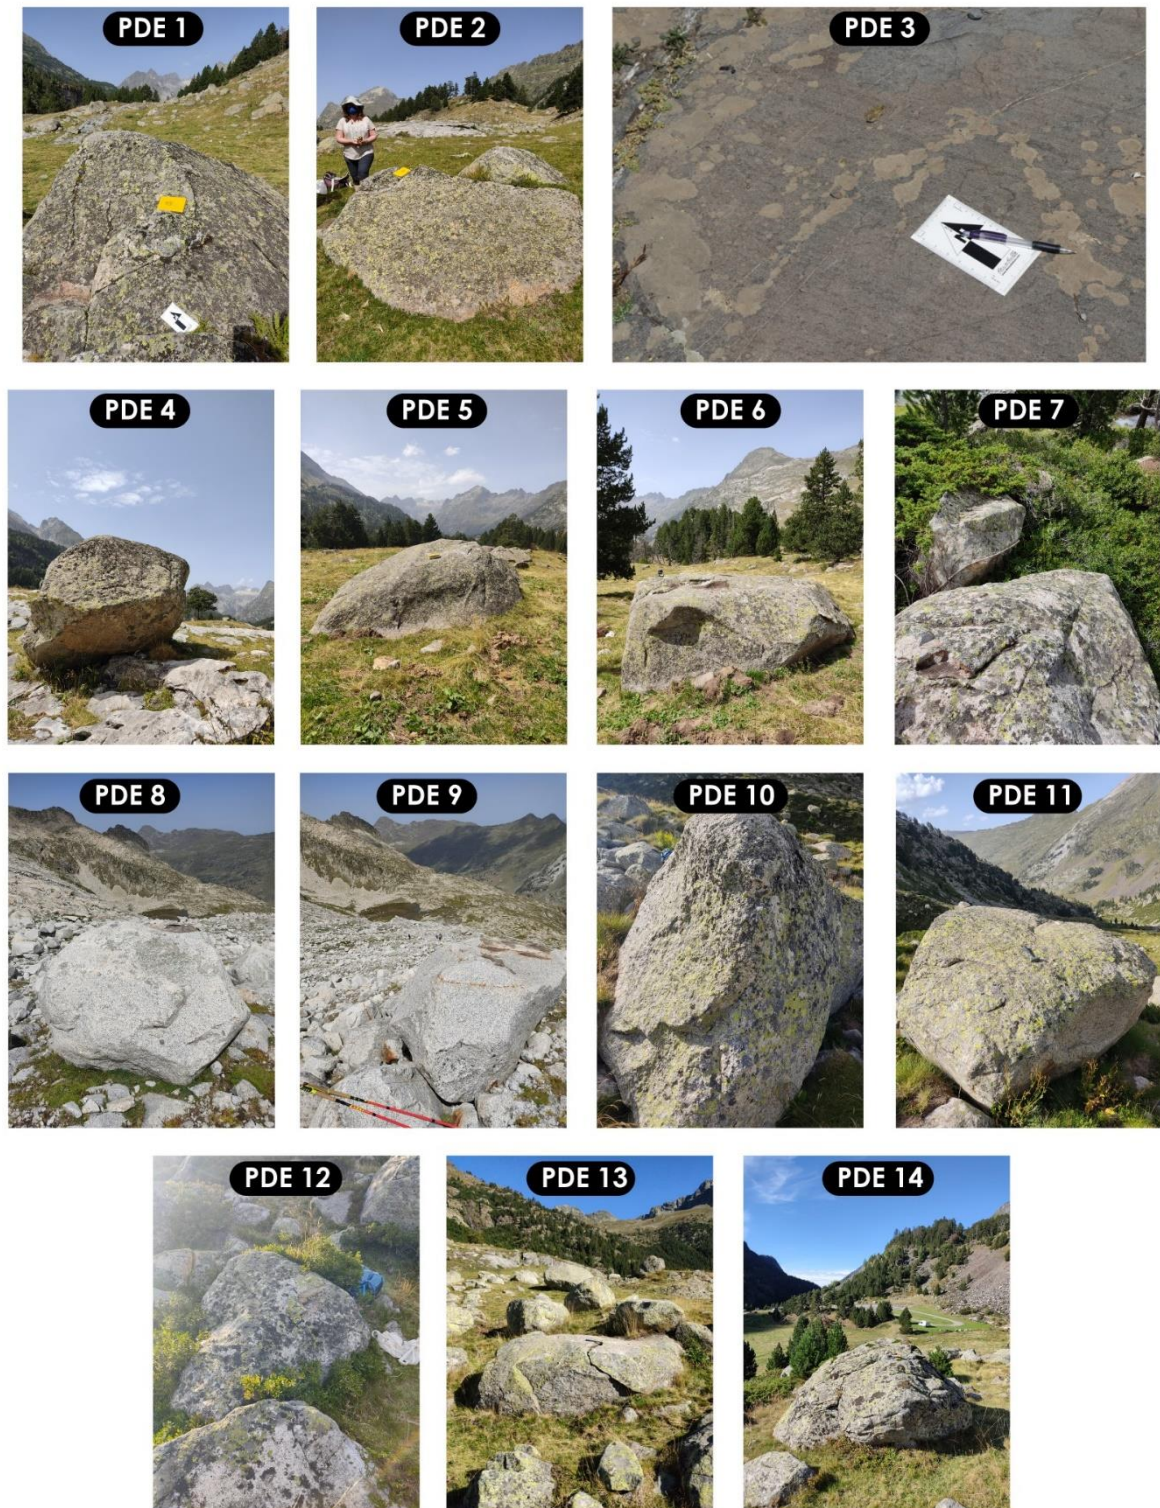

**Figure S1: Photographs of the samples taken in the Ésera valley and Maladeta massif. PDE-1 and -2 corresponds with the samples located in the threshold of Pllan d'Están basin; PDE-3 and -4 are located in a threshold in the middle of Pllan d'Están basin; PDE-5, -6 and -12 correspond with a till between Pllan d'Están and Aiguallut ponor; PDE-7 is located near to Renclusa hut; PDE-8 and -9 are boulders of the Aneto LIA moraine; PDE-10 and -11 corresponds to a moraine between Aiguallut ponor and Barrancs lake; and PDE-13 and -14 are granitic blocks of the moraine of Llanos del Hospital.**

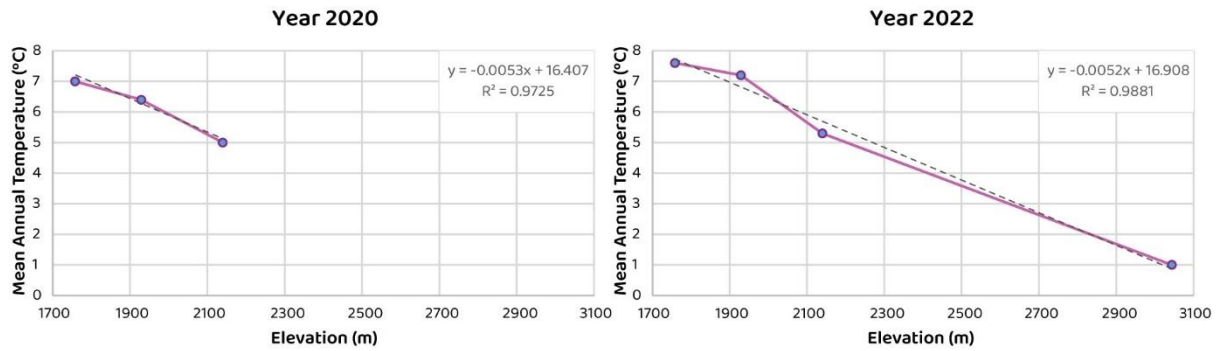

Figure S2: Altitudinal gradient of temperature for the years 2022 and 2020 based on the data of some weather station of the headwaters of Èsera valley.

| ID    | Latitude (°N) | Longitude (°E) | Elevation (m) | Thickness (cm) | Topographic shielding | Boulder height above ground (cm) | Snow shielding (a) | Snow shielding (a, b) |
|-------|---------------|----------------|---------------|----------------|-----------------------|----------------------------------|--------------------|-----------------------|
| PDE1  | 42.6820       | 0.6337         | 1848          | 2.48           | 0.9318                | 160                              | 0.9954             | 0.8622                |
| PDE2  | 42.6816       | 0.6344         | 1849          | 2.13           | 0.9605                | 50                               | 0.9178             | 0.8622                |
| PDE3  | 42.6810       | 0.6452         | 1880          | 3.04           | 0.9845                | -                                | 0.8622             | -                     |
| PDE4  | 42.6807       | 0.6433         | 1854          | 2.11           | 0.9190                | 200                              | 1.0000             | -                     |
| PDE5  | 42.6766       | 0.6539         | 1933          | 1.59           | 0.9684                | 120                              | 0.9730             | -                     |
| PDE6  | 42.6768       | 0.6530         | 1937          | 1.37           | 0.9800                | 125                              | 0.9758             | -                     |
| PDE7  | 42.6723       | 0.6522         | 2039          | 3.87           | 0.9670                | 160                              | 0.9954             | -                     |
| PDE8  | 42.6487       | 0.6579         | 2660          | 4.35           | 0.9909                | 126                              | 0.9764             | -                     |
| PDE9  | 42.6496       | 0.6585         | 2634          | 1.87           | 0.9910                | 120                              | 0.9730             | -                     |
| PDE10 | 42.6555       | 0.6661         | 2189          | 2.04           | 0.9393                | 140                              | 0.9844             | -                     |
| PDE11 | 42.6555       | 0.6661         | 2195          | 1.72           | 0.9660                | 180                              | 0.9999             | -                     |
| PDE12 | 42.6726       | 0.6617         | 1995          | 4.68           | 0.9597                | 80                               | 0.9448             | -                     |
| PDE13 | 42.6831       | 0.6057         | 1755          | 3.44           | 0.8113                | 70                               | 0.9367             | -                     |
| PDE14 | 42.6830       | 0.6058         | 1744          | 4.42           | 0.8523                | 120                              | 0.9730             | -                     |

Table S1: Sample and field data. All samples were collected from granitic erratic boulder surfaces except PDE3, which was collected from a glacially-polished quartzite bedrock surface. Density is assumed to be  $2.65 \text{ g/cm}^3$  for all samples. (a) Calculated using a formula (Eq. 3.76) in Gosse and Phillips (2001) with average monthly snow accumulation during 20087-2023 (AEMET database). (b) Calculated without considering boulder height above ground (see main text for details).

| Field ID | Quartz mass (g) | <sup>9</sup> Be spike (mg) | <sup>27</sup> Al (ug/g(Qz)) | <sup>10</sup> Be/ <sup>9</sup> Be (10 <sup>-13</sup> ) (a) | Err   | <sup>26</sup> Al/ <sup>27</sup> Al (10 <sup>-13</sup> ) (b) | Err   | <sup>10</sup> Be (c) (10 <sup>5</sup> atoms/g(Qz)) | Err (c) | <sup>26</sup> Al (d) (10 <sup>5</sup> atoms/g(Qz)) | Err (e) | <sup>26</sup> Al/ <sup>10</sup> Be | Err |
|----------|-----------------|----------------------------|-----------------------------|------------------------------------------------------------|-------|-------------------------------------------------------------|-------|----------------------------------------------------|---------|----------------------------------------------------|---------|------------------------------------|-----|
| PDE1     | 12.04           | 0.2686                     | 249.8                       | 1.258                                                      | 0.044 | -                                                           | -     | 1.830                                              | 0.068   | -                                                  | -       | -                                  | -   |
| PDE2     | 12.08           | 0.2666                     | 295.3                       | 1.265                                                      | 0.040 | -                                                           | -     | 1.820                                              | 0.063   | -                                                  | -       | -                                  | -   |
| PDE3     | 3.01            | 0.2517                     | 2033.8                      | 0.367                                                      | 0.027 | 0.339                                                       | 0.065 | 1.906                                              | 0.153   | 15.2                                               | 3.0     | 8.0                                | 1.7 |
| PDE4     | 12.04           | 0.2713                     | 252.8                       | 1.500                                                      | 0.049 | -                                                           | -     | 2.213                                              | 0.077   | -                                                  | -       | -                                  | -   |
| PDE5     | 12.01           | 0.2688                     | 940.3                       | 1.505                                                      | 0.051 | -                                                           | -     | 2.206                                              | 0.082   | -                                                  | -       | -                                  | -   |
| PDE6     | 12.01           | 0.2682                     | 254.5                       | 1.462                                                      | 0.047 | -                                                           | -     | 2.136                                              | 0.074   | -                                                  | -       | -                                  | -   |
| PDE7     | 12.17           | 0.2679                     | 328.2                       | 1.712                                                      | 0.055 | -                                                           | -     | 2.474                                              | 0.085   | -                                                  | -       | -                                  | -   |
| PDE8     | 30.17           | 0.2225                     | 257.0                       | 0.314                                                      | 0.023 | -                                                           | -     | 0.140                                              | 0.012   | -                                                  | -       | -                                  | -   |
| PDE9     | 30.07           | 0.2229                     | 223.6                       | 0.293                                                      | 0.033 | -                                                           | -     | 0.130                                              | 0.016   | -                                                  | -       | -                                  | -   |
| PDE10    | 12.04           | 0.2677                     | 258.4                       | 1.481                                                      | 0.068 | -                                                           | -     | 2.155                                              | 0.138   | -                                                  | -       | -                                  | -   |
| PDE11    | 12.05           | 0.2682                     | 276.1                       | 1.516                                                      | 0.051 | -                                                           | -     | 2.209                                              | 0.080   | -                                                  | -       | -                                  | -   |
| PDE12    | 12.08           | 0.2688                     | 233.1                       | 1.513                                                      | 0.051 | -                                                           | -     | 2.204                                              | 0.071   | -                                                  | -       | -                                  | -   |
| PDE13    | 12.05           | 0.2684                     | 227.2                       | 1.344                                                      | 0.044 | -                                                           | -     | 1.955                                              | 0.069   | -                                                  | -       | -                                  | -   |
| PDE14    | 12.05           | 0.2686                     | 136.1                       | 1.405                                                      | 0.052 | -                                                           | -     | 2.048                                              | 0.081   | -                                                  | -       | -                                  | -   |

5 **Table S2: Laboratory data. All samples were processed to beryllium hydroxides in Cosmogenic Nuclide Dating Laboratory at CENIEH and then calcined to oxides in ASTER. Uncertainties are in one sigma. (a) Measured in ASTER against the standard STD-11 with the nominal <sup>10</sup>Be/<sup>9</sup>Be ratio of  $1.191 \pm 0.013 \times 10^{-11}$ , which was calibrated against the standard NIST SRM4325 with the nominal ratio of  $2.79 \pm 0.03 \times 10^{-11}$  (Braucher et al., 2015). (b) Measured in ASTER against the standard SM-Al-11 with the nominal <sup>26</sup>Al/<sup>27</sup>Al ratio of  $7.401 \pm 0.064 \times 10^{-12}$  (Arnold et al., 2010; Merchel and Bremser, 2004). (c) Corrected for procedural blanks with the <sup>10</sup>Be/<sup>9</sup>Be ratios of  $2.6\text{-}4.0 \times 10^{-15}$ . (d) Corrected for procedural blanks with the <sup>26</sup>Al/<sup>27</sup>Al ratios of  $1.6\text{-}5.5 \times 10^{-15}$ . (e) Calculated from AMS uncertainties (counting statistics, standard reproducibility, error in the standard nominal ratio, blank correction) and, for <sup>10</sup>Be, 1% error in <sup>9</sup>Be spike concentration, and, for <sup>26</sup>Al, 3% error in ICP-OES Al measurements, in quadrature.**

| Field ID | With no snow shielding <sup>(a)</sup> |          |          |            |          |          | With snow shielding <sup>(b)</sup> |          |          |              |              |              | With snow shielding ignoring boulder heights <sup>(c)</sup> |          |          |              |             |             |
|----------|---------------------------------------|----------|----------|------------|----------|----------|------------------------------------|----------|----------|--------------|--------------|--------------|-------------------------------------------------------------|----------|----------|--------------|-------------|-------------|
|          | At 0 mm/ka (Minimum ages)             | Int. err | Ext. err | At 3 mm/ka | Int. err | Ext. err | At 0 mm/ka                         | Int. err | Ext. err | At 3 mm/ka   | Int. err     | Ext. err     | At 0 mm/ka                                                  | Int. err | Ext. err | At 3 mm/ka   | Int. err    | Ext. err    |
| PDE1     | 11.68                                 | 0.44     | 0.82     | 11.97      | 0.46     | 0.86     | 11.72                              | 0.44     | 0.82     | 12.02        | 0.46         | 0.87         | 13.24                                                       | 0.49     | 0.93     | <b>13.68</b> | <b>0.53</b> | <b>0.99</b> |
| PDE2     | 11.28                                 | 0.39     | 0.77     | 11.58      | 0.41     | 0.82     | 12.14                              | 0.42     | 0.83     | 12.47        | 0.45         | 0.88         | 12.80                                                       | 0.45     | 0.88     | <b>13.17</b> | <b>0.47</b> | <b>0.93</b> |
| PDE3     | 11.34                                 | 0.92     | 1.14     | 11.63      | 0.97     | 1.20     | 12.86                              | 1.04     | 1.29     | <b>13.24</b> | <b>1.11</b>  | <b>1.37</b>  | -                                                           | -        | -        | -            | -           | -           |
| PDE4     | 13.87                                 | 0.49     | 0.95     | 14.34      | 0.52     | 1.02     | 13.87                              | 0.49     | 0.95     | <b>14.34</b> | <b>0.52</b>  | <b>1.02</b>  | -                                                           | -        | -        | -            | -           | -           |
| PDE5     | 12.47                                 | 0.45     | 0.87     | 12.82      | 0.48     | 0.92     | 12.76                              | 0.47     | 0.89     | <b>13.12</b> | <b>0.49</b>  | <b>0.94</b>  | -                                                           | -        | -        | -            | -           | -           |
| PDE6     | 11.96                                 | 0.42     | 0.82     | 12.27      | 0.44     | 0.87     | 12.20                              | 0.42     | 0.84     | <b>12.54</b> | <b>0.45</b>  | <b>0.89</b>  | -                                                           | -        | -        | -            | -           | -           |
| PDE7     | 13.07                                 | 0.45     | 0.90     | 13.49      | 0.48     | 0.96     | 13.12                              | 0.46     | 0.90     | <b>13.55</b> | <b>0.49</b>  | <b>0.96</b>  | -                                                           | -        | -        | -            | -           | -           |
| PDE8     | 0.420                                 | 0.036    | 0.044    | 0.420      | 0.036    | 0.044    | 0.429                              | 0.037    | 0.045    | <b>0.429</b> | <b>0.037</b> | <b>0.045</b> | -                                                           | -        | -        | -            | -           | -           |
| PDE9     | 0.390                                 | 0.050    | 0.055    | 0.390      | 0.050    | 0.055    | 0.400                              | 0.051    | 0.056    | <b>0.401</b> | <b>0.051</b> | <b>0.057</b> | -                                                           | -        | -        | -            | -           | -           |
| PDE10    | 10.65                                 | 0.51     | 0.81     | 10.91      | 0.54     | 0.86     | 10.80                              | 0.52     | 0.83     | <b>11.07</b> | <b>0.55</b>  | <b>0.87</b>  | -                                                           | -        | -        | -            | -           | -           |
| PDE11    | 10.56                                 | 0.38     | 0.73     | 10.81      | 0.40     | 0.77     | 10.56                              | 0.39     | 0.73     | <b>10.81</b> | <b>0.40</b>  | <b>0.77</b>  | -                                                           | -        | -        | -            | -           | -           |
| PDE12    | 12.32                                 | 0.44     | 0.85     | 12.66      | 0.47     | 0.91     | 12.93                              | 0.47     | 0.90     | <b>13.33</b> | <b>0.50</b>  | <b>0.96</b>  | -                                                           | -        | -        | -            | -           | -           |
| PDE13    | 15.03                                 | 0.53     | 1.04     | 15.60      | 0.58     | 1.12     | 15.99                              | 0.57     | 1.10     | <b>16.64</b> | <b>0.62</b>  | <b>1.20</b>  | -                                                           | -        | -        | -            | -           | -           |
| PDE14    | 15.23                                 | 0.61     | 1.09     | 15.82      | 0.65     | 1.17     | 15.63                              | 0.62     | 1.11     | <b>16.26</b> | <b>0.67</b>  | <b>1.21</b>  | -                                                           | -        | -        | -            | -           | -           |

10 Table S3: <sup>10</sup>Be exposure ages (ka). All ages were calculated using CRONUS-Earth online calculator (<https://hess.ess.washington.edu/>, Balco et al., 2008) with wrapper version 3.0.2. Here, ages using LSDn scaling (Lifton et al., 2014) are shown. Two cases of erosion rates were assumed, i.e., 0 and 3 mm/ka. Uncertainties are in one sigma. "Int." (internal) errors only include analytical errors and "Ext." (external) errors also include systematic errors (e.g., half-life, production rates). When compared to other geochronological data, external errors must be considered. Values in bold denote 'Best ages' shown in Table 1 in the main text. (a) Calculated without snow shielding. (b) Calculated with snow shielding (see Supplementary Table S1). (c) Calculated with snow shielding ignoring boulder heights for the samples PDE-1 and PDE-2 (see Supplementary Table S1).

15

## References

- Arnold, M., Merchel, S., Bourlès, D., Braucher, R., Benedetti, L., Finkel, R., Aumaître, G., Gottdang, A., and Klein, M.: The French accelerator mass spectrometry facility ASTER: Improved performance and developments, *Nucl. Instruments Methods Phys. Res. Sect. B-beam Interact. With Mater. Atoms - NUCL INSTRUM METH PHYS RES B*, 268, 1954–1959, <https://doi.org/10.1016/j.nimb.2010.02.107>, 2010.
- Balco, G., Stone, J. O., Lifton, N. A., and Dunai, T. J.: A complete and easily accessible means of calculating surface exposure ages or erosion rates from  $^{10}\text{Be}$  and  $^{26}\text{Al}$  measurements, *Quat. Geochronol.*, 3, 174–195, <https://doi.org/10.1016/j.quageo.2007.12.001>, 2008.
- Braucher, R., Guillou, V., Bourlès, D. L., Arnold, M., Aumaître, G., Keddadouche, K., and Nottoli, E.: Preparation of ASTER in-house  $^{10}\text{Be}/^{9}\text{Be}$  standard solutions, *Nucl. Instruments Methods Phys. Res. Sect. B Beam Interact. with Mater. Atoms*, 361, 335–340, <https://doi.org/10.1016/j.nimb.2015.06.012>, 2015.
- Gosse, J. C. and Phillips, F. M.: Terrestrial in situ cosmogenic nuclides: theory and application, *Quat. Sci. Rev.*, 20, 1475–1560, [https://doi.org/10.1016/S0277-3791\(00\)00171-2](https://doi.org/10.1016/S0277-3791(00)00171-2), 2001.
- Lifton, N., Sato, T., and Dunai, T.: Scaling in situ cosmogenic nuclide production rates using analytical approximations to atmospheric cosmic-ray fluxes, *Earth Planet. Sci. Lett.*, 386, 149–160, <https://doi.org/10.1016/j.epsl.2013.10.052>, 2014.
- Merchel, S. and Bremser, W.: First international  $^{26}\text{Al}$  interlaboratory comparison – Part I, *Nucl. Instruments Methods Phys. Res. Sect. B Beam Interact. with Mater. Atoms*, 223–224, 393–400, <https://doi.org/10.1016/j.nimb.2004.04.076>, 2004.
